# Supplementary material for: Unravelling the electrochemical activation and the reaction mechanism of maricite-NaFePO4 using multimodal operando techniques
Source: Royal Society of Chemistry journal article supplement (doi:10.1039/d3ta03791f), 2023-01-01
Supplement: d3ta03791f1.pdf [file d3ta03791f1.pdf]

### SUPPLEMENTARY INFORMATION

## Unravelling the electrochemical activation and the reaction mechanism of *maricite*-NaFePO<sub>4</sub> using multimodal operando techniques

Carlos Berlanga,<sup>a,b</sup> Moulay Tahar Sougrati,<sup>c,d</sup> Antonio J. Fernández-Ropero,<sup>a</sup> Neyrouz Baaboura,<sup>a</sup> Nicholas E. Drewett,<sup>a</sup> Juan M. Lopez del Amo,<sup>a</sup> Gene Nolis,<sup>a</sup> Jose S. Garitaonandia,<sup>e</sup> Marine Reynaud,<sup>a</sup> Lorenzo Stievano,<sup>c,d</sup> Montse Casas-Cabanas<sup>a,f,\*</sup> and Montse Galceran<sup>a,\*</sup>

a. Center for Cooperative Research on Alternative Energies (CIC energiGUNE), Basque Research and Technology Alliance (BRTA), Parque Tecnológico de Álava, Albert Einstein, 48, 01510, Vitoria-Gasteiz, Spain.

b. Departamento de Química Inorgánica, Universidad del País Vasco UPV/EHU, P.O. Box 644, 48080 Bilbao, Spain.

c. ICGM, Univ. Montpellier, CNRS, ENSCM, Montpellier, France

d. RS2E, CNRS, Amiens, France

e. Dpto. Física. Facultad de Ciencia y Tecnología. Universidad del País Vasco (UPV/EHU) P.O. Box 644, 48080 Bilbao

f. IKERBASQUE, Basque Foundation for Science, 48013 Bilbao, Spain;

### Tables and Figures

**Table SI1.** Summary of the unit cell parameters and average crystallite size obtained from the Le Bail refinement of the XRD patterns of the 5 samples depending on the ball-milling time

| S.G.<br><i>Pnma</i> | <i>a</i> (Å) | <i>b</i> (Å) | <i>c</i> (Å) | <i>V</i> (Å <sup>3</sup> ) | Crystallite size (nm) |
|---------------------|--------------|--------------|--------------|----------------------------|-----------------------|
| <b>NFP_0h</b>       | 8.9959(9)    | 6.8617(8)    | 5.0459(6)    | 310.90(3)                  | 170 ± 3               |
| <b>NFP_3h</b>       | 8.9903(3)    | 6.8573(5)    | 5.0437(4)    | 310.90(4)                  | 30 ± 0.5              |
| <b>NFP_6h</b>       | 8.9902(8)    | 6.8582(6)    | 5.0437(5)    | 310.98(5)                  | 24 ± 0.3              |
| <b>NFP_9h</b>       | 8.990(2)     | 6.858(1)     | 5.034(1)     | 310.9(1)                   | 20 ± 0.3              |
| <b>NFP_12h</b>      | 8.987(1)     | 6.856(1)     | 5.0408(8)    | 310.98(5)                  | 15 ± 0.1              |

**Table SI2.** Summary of first charge and discharge capacity of the NaFePO<sub>4</sub>/C after different ball milling times 0h (NFP\_0h) 3h (NFP\_3h), 6h (NFP\_6h), 9h (NFP\_9h) and 12h (NFP\_12h) and valence of the iron contained in the samples as determined from Mössbauer spectroscopy

| Sample         | Galvanostatic cycle                           |                                                  | Mössbauer spectroscopy |                  |
|----------------|-----------------------------------------------|--------------------------------------------------|------------------------|------------------|
|                | 1 <sup>st</sup> charge (mAh g <sup>-1</sup> ) | 1 <sup>st</sup> discharge (mAh g <sup>-1</sup> ) | Fe <sup>2+</sup>       | Fe <sup>3+</sup> |
| <b>NFP_0h</b>  | 21                                            | 13                                               | 100%                   | 0                |
| <b>NFP_3h</b>  | 50                                            | 65                                               | 83 %                   | 17 %             |
| <b>NFP_6h</b>  | 62                                            | 85                                               | 72 %                   | 28 %             |
| <b>NFP_9h</b>  | 64                                            | 92                                               | 66 %                   | 34 %             |
| <b>NFP_12h</b> | 72                                            | 100                                              | 63 %                   | 37 %             |

**Table SI3.** Mössbauer spectroscopy parameters of NFP\_12h ball milled under different atmospheres (air and neutral atmosphere of Argon)

|               |                  | ISO (mm s <sup>-1</sup> ) | QUA (mm s <sup>-1</sup> ) | WID (0.3 mm s <sup>-1</sup> ) | Fe% |
|---------------|------------------|---------------------------|---------------------------|-------------------------------|-----|
| NFP_12h_Air   | Fe <sup>2+</sup> | 1.21                      | 2.20                      | 0.35                          | 63% |
|               | Fe <sup>3+</sup> | 0.36                      | 0.99                      | 0.55                          | 37% |
| NFP_12h_Argon | Fe <sup>2+</sup> | 1.20                      | 2.20                      | 0.37                          | 64% |
|               | Fe <sup>3+</sup> | 0.39                      | 0.93                      | 0.60                          | 36% |

**Table SI4.** Crystallographic data (unit cell parameters, atomic positions, isotropic agitation factors  $B_{iso}$ , site occupancies) of NFP\_12h obtained from the Rietveld refinement of its SXRD pattern ( $R_p = 7.42$ ;  $R_{wp} = 7.16$ ;  $R_e = 2.40$ ;  $\chi^2 = 8.90$ )

| S.G. |              | $a = 8.9927(5) \text{ \AA}$ | $b = 6.8604(3) \text{ \AA}$ | $c = 5.0446(3) \text{ \AA}$ |          |
|------|--------------|-----------------------------|-----------------------------|-----------------------------|----------|
| Atom | Wickoff site | $x/a$                       | $y/b$                       | $z/c$                       | Occ      |
| O1   | 8d           | 0.121(1)                    | 0.066(1)                    | 0.328(2)                    | 1.0000   |
| O2   | 4c           | 0.350(1)                    | 0.250                       | 0.463(3)                    | 0.5000   |
| O3   | 4c           | 0.123(2)                    | 0.250                       | 0.747(3)                    | 0.5000   |
| Fe1  | 4a           | 0                           | 0                           | 0                           | 0.5000   |
| P1   | 4c           | 0.176(1)                    | 0.250                       | 0.456(2)                    | 0.5000   |
| Na1  | 4c           | 0.345(1)                    | 0.250                       | 0.969(3)                    | 0.480(8) |

**Table SI5.** Summary of the in situ Mössbauer spectroscopy data. Evolution of the voltage capacity, time and valence of the iron extracted from figure 9

| Voltage (V) | Capacity (mAh g <sup>-1</sup> ) | Time (h) | Fe <sup>2+</sup> | Fe <sup>2+</sup> | Fe <sup>2+</sup> (A) | Fe <sup>2+</sup> (B) | Fe <sup>3+</sup> (A) | Fe <sup>3+</sup> (B) |
|-------------|---------------------------------|----------|------------------|------------------|----------------------|----------------------|----------------------|----------------------|
| OCV         | 0                               | 0        | 58.5             | 41.5             | 50.5                 | 10.3                 | 28.7                 | 10.5                 |
| 4.5         | 50                              | 16       | 50.2             | 49.8             | 45.2                 | 7.8                  | 34.4                 | 12.6                 |
| 1.5         | 80                              | 40       | 90.5             | 9.5              | 71                   | 20.1                 | 6.5                  | 2.4                  |
| 4.5         | 82                              | 64       | 53.5             | 46.5             | 47.3                 | 8.8                  | 32.1                 | 11.6                 |

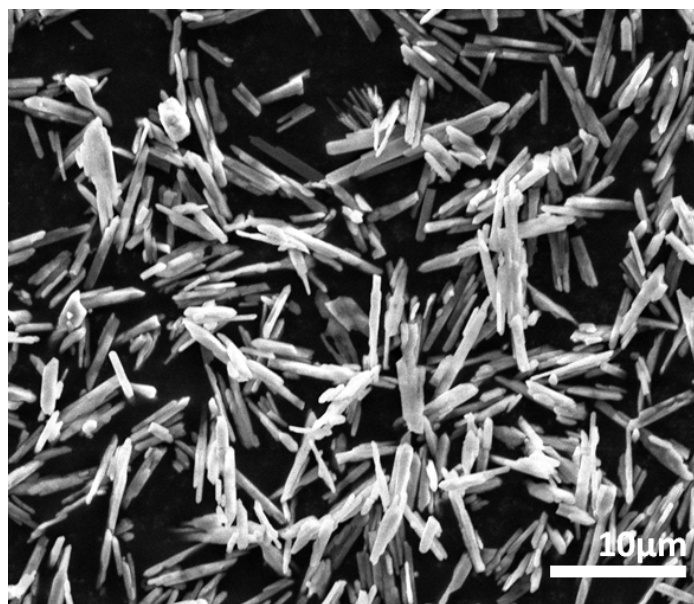

**Figure SI1.** SEM image of the pure maricite  $\text{NaFePO}_4$  obtained by hydrothermal synthesis (NFP\_0h)

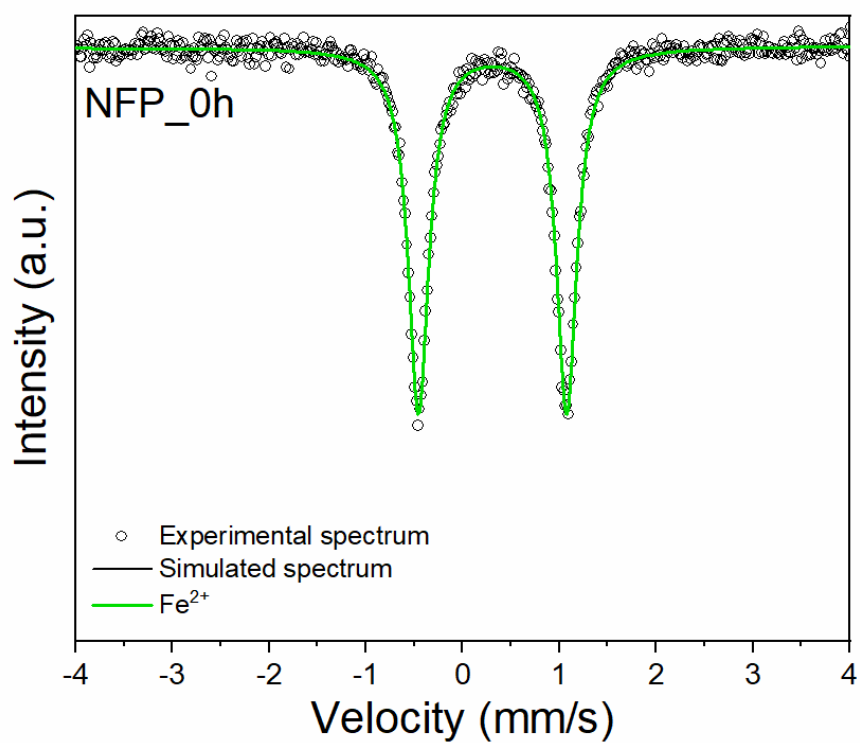

**Figure SI2.** Mössbauer spectrum of pristine maricite  $\text{NaFePO}_4$  (NFP\_0h) prepared by hydrothermal synthesis

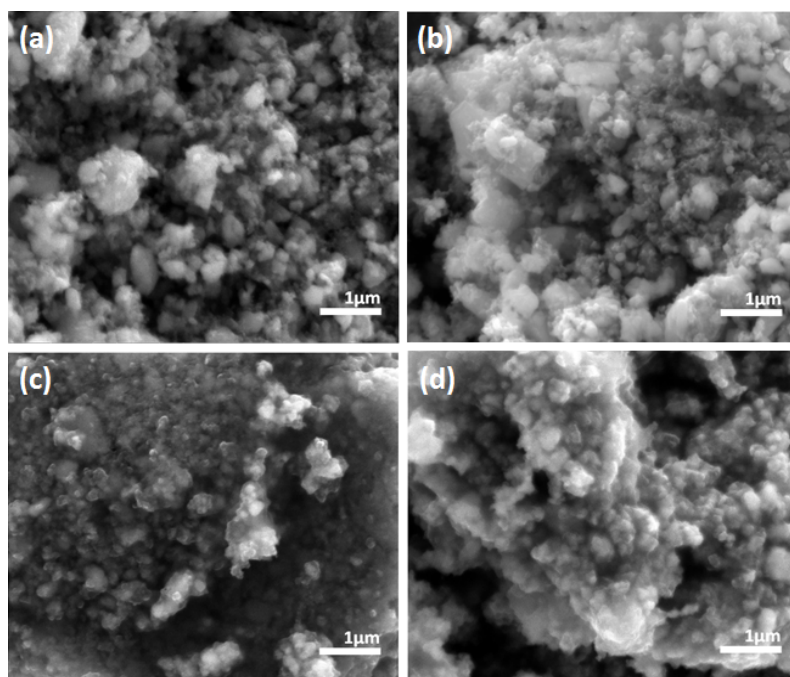

**Figure S13.** SEM images of the NaFePO<sub>4</sub>/C after different ball milling times (a) 3h (NFP\_3h), (b) 6h (NFP\_6h), (c) 9h (NFP\_9h) and (d) 12h (NFP\_12h).

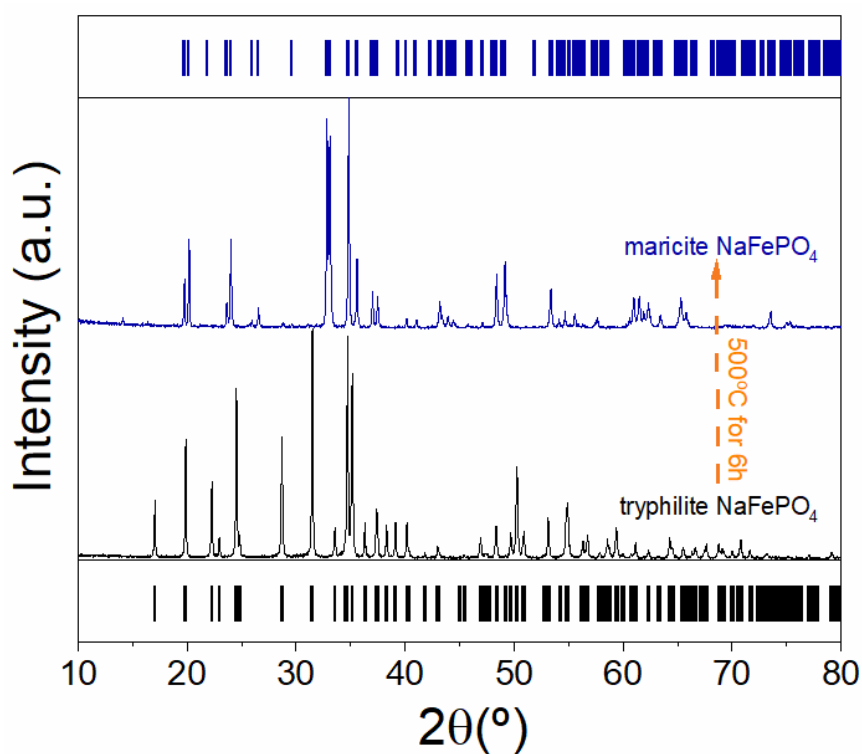

**Figure S14.** XRD patterns of triphylite carbon coated NFP (cc-t-NFP) obtained after chemical delithiation and posterior chemical sodiation of commercial carbon coated LiFePO<sub>4</sub>, and maricite NFP (cc-m-NFP) obtained from carbon coated NFP after heat treatment. The short vertical lines indicate the Bragg peak positions of the maricite NFP (blue vertical lines) and triphylite NFP (black vertical lines)

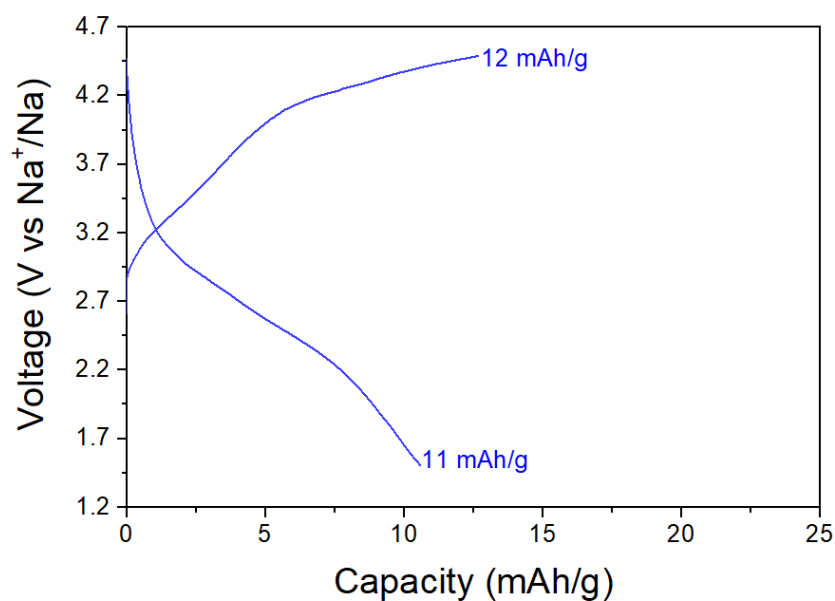

**Figure S15.** First charge and discharge curve of pristine maricite carbon coated  $\text{NaFePO}_4$  (cc-m-NFP) obtained by heat treat of triphylite carbon coated NFP (cc-t-NFP)

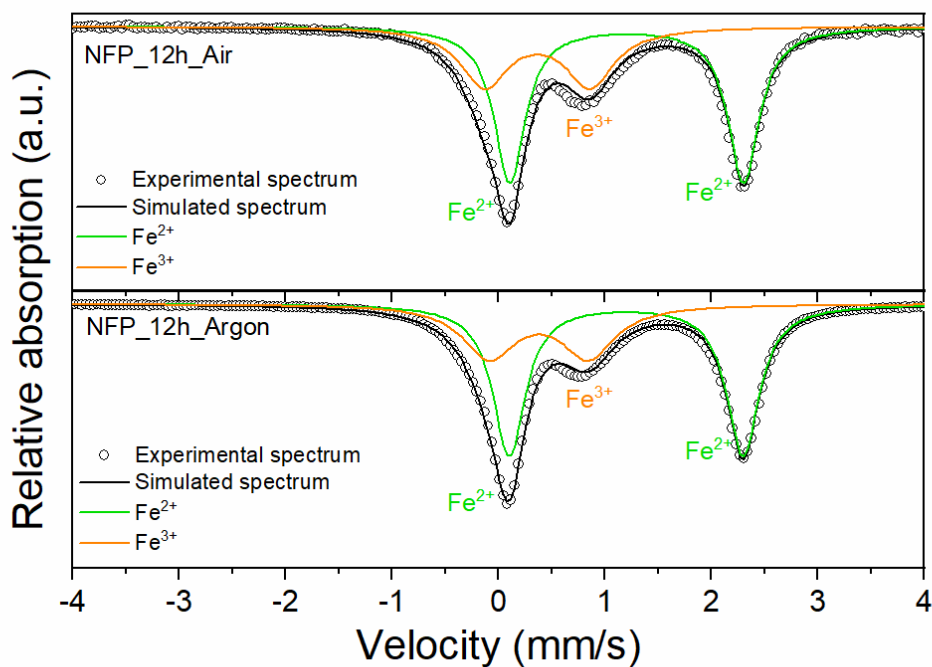

**Figure S16.** Mössbauer spectra of NFP\_12h in different atmospheres (air and argon). The corresponding hyperfine parameters are given in Table S13.

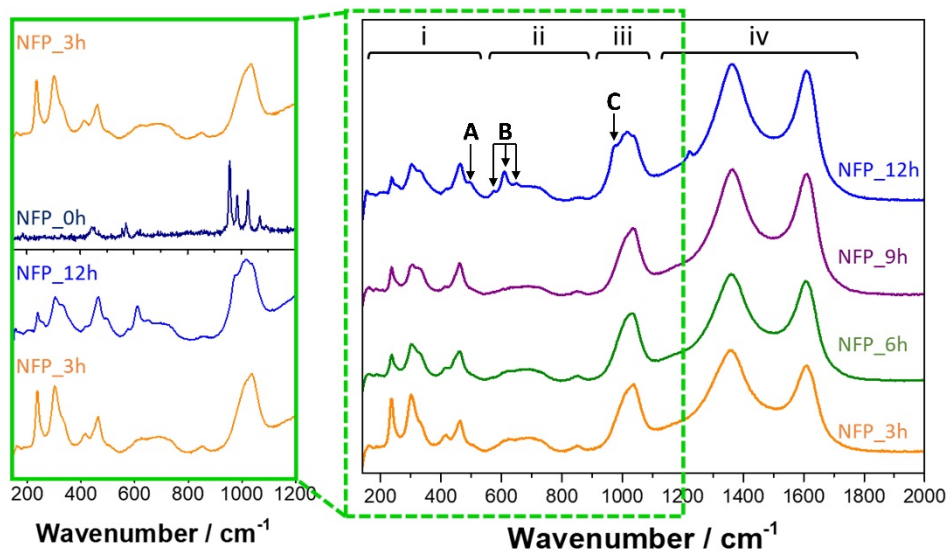

**Figure S17.** Raman spectra for samples after ball milling for differing time periods

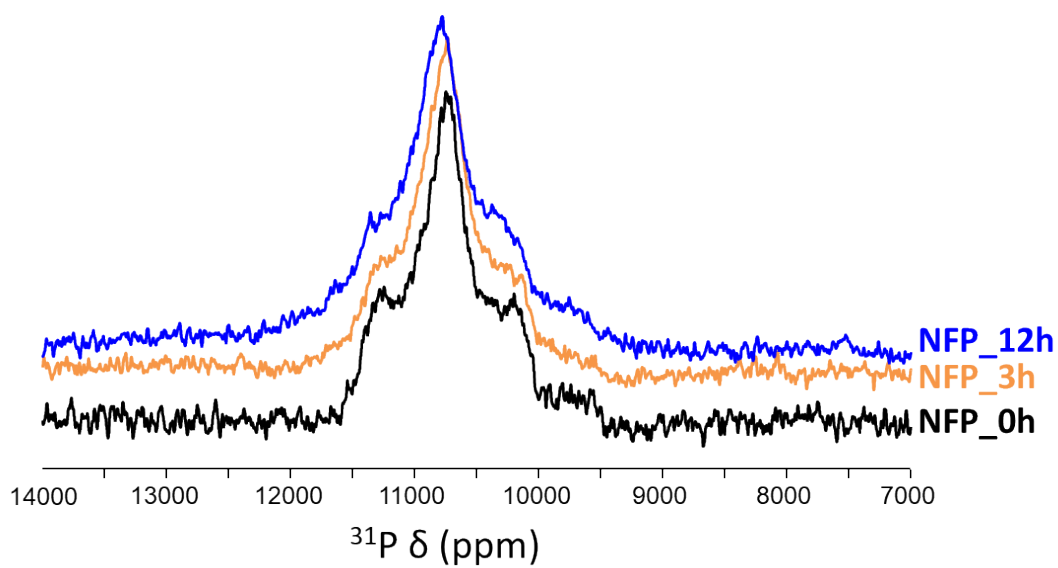

**Figure S18.**  $^{31}\text{P}$  solid state NMR spectrum of pristine NFP\_0h and at 3h and 12h ball milling time.

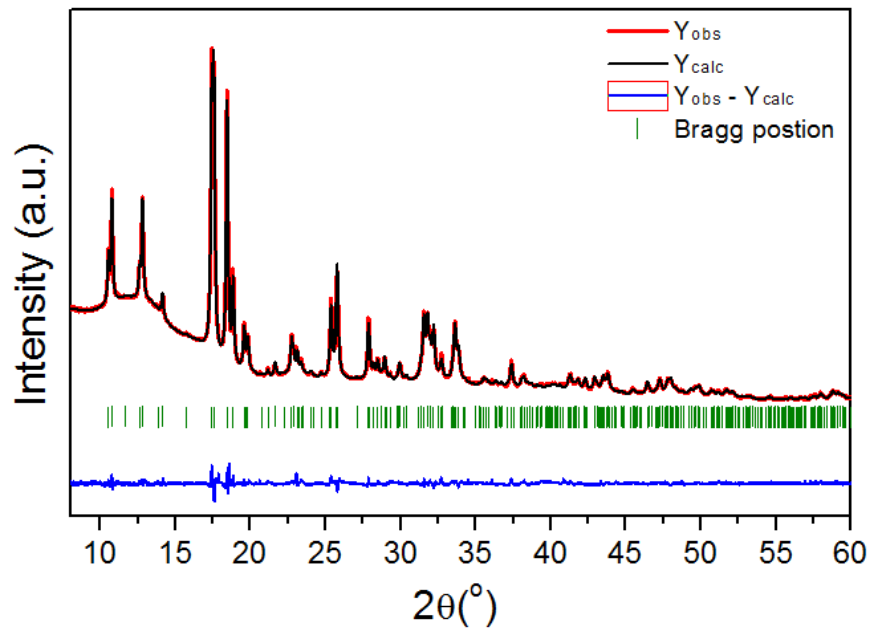

**Figure S19.** Rietveld refinement of the SXR D of the NFP\_12h measured on a capillary.
